# Supplementary material for: N2 activation on Al metal clusters: catalyzing role of BN-doped graphene support
Source: Royal Society of Chemistry journal article supplement (doi:10.1039/c6cp03342c), 2016-01-01
Supplement: c6cp03342c1.pdf [file c6cp03342c1.pdf]

## Supporting Information

# N<sub>2</sub> Activation on Al Metal Clusters: Catalyzing role of BN-doped Graphene Support

Deepak Kumar<sup>a</sup>, Sourav Pal<sup>b\*</sup> and Sailaja Krishnamurty<sup>c\*</sup>

<sup>a</sup> Physical Chemistry Division, CSIR-National Chemical Laboratory, Pune 411008, India

<sup>b</sup> Department of Chemistry, Indian Institute of Technology Bombay, Powai, Mumbai  
400076, India

<sup>c</sup> Functional Materials Division, CSIR-Central Electrochemical Research Institute, Karaikudi  
630006, India

\*Email: [s.pal@ncl.res.in](mailto:s.pal@ncl.res.in)

\*Email: [sailaja.raaj@gmail.com](mailto:sailaja.raaj@gmail.com)

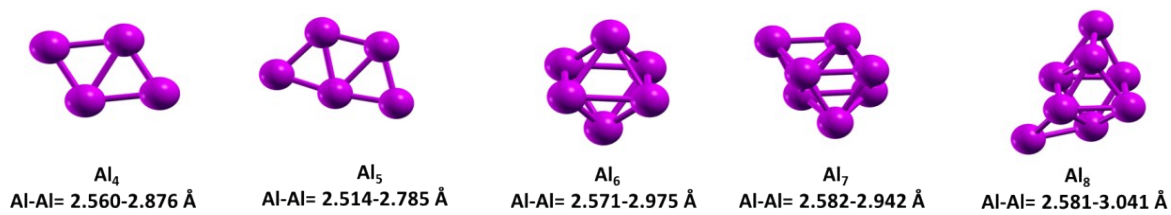

Figure S1: Optimized structures of ground state  $\text{Al}_{4-8}$  clusters

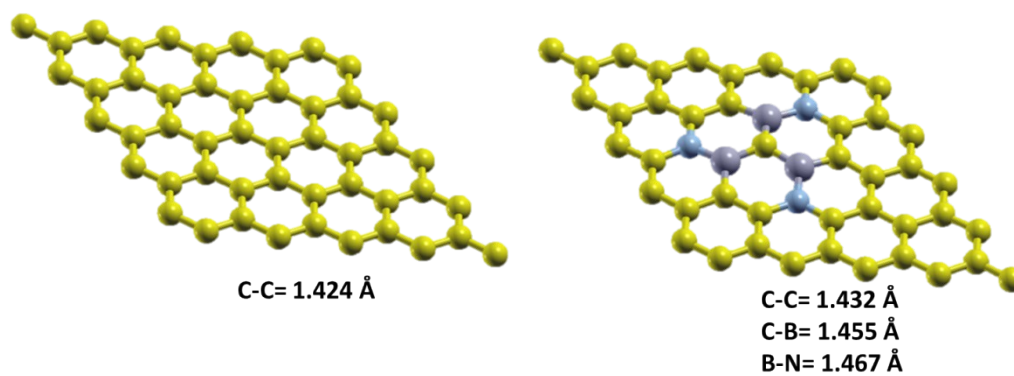

Figure S2: Optimized structures of Graphene and BN-doped graphene

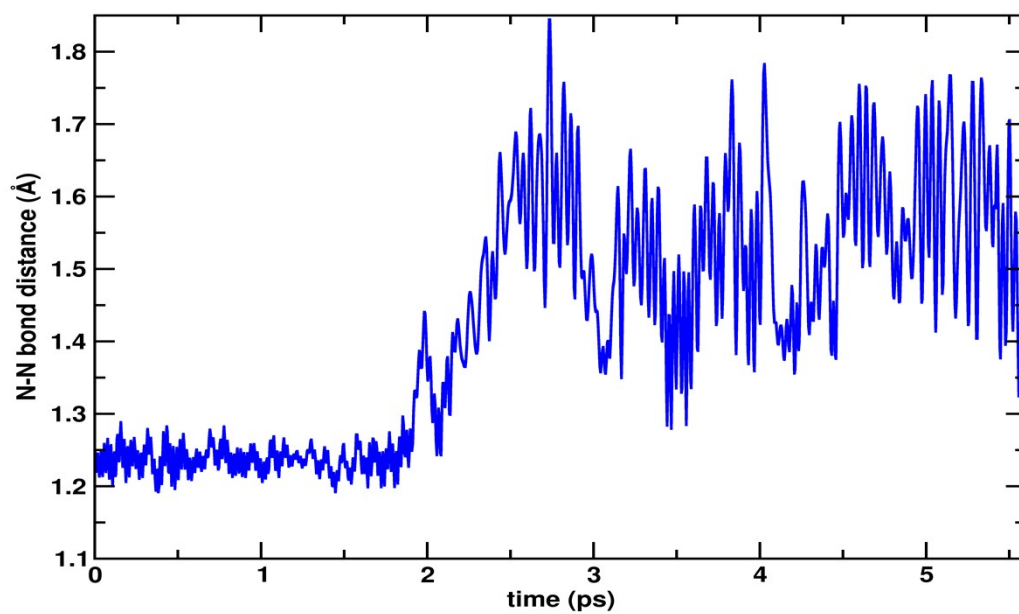

Figure S3: N-N bond length fluctuations in  $Al_4@BN\_graphene-N_2$  complex at 300 K.

Table S1 N<sub>2</sub> activation on Li<sub>4</sub>/Ru<sub>4</sub> clusters with vibrational frequencies

| System                              | Li-N/Ru-N(Å) | C-Li/C-Ru(Å) | N-N(Å) | Vib. Frequency(cm <sup>-1</sup> ) |
|-------------------------------------|--------------|--------------|--------|-----------------------------------|
| N <sub>2</sub> @Li <sub>4</sub>     | 2.221-2.244  |              | 1.125  | 2246                              |
| N <sub>2</sub> @Li <sub>4</sub> _BN | 2.104-2.134  | 2.051        | 1.146  | 2130                              |
| N <sub>2</sub> @Ru <sub>4</sub>     | 1.961-1.966  |              | 1.203  | 1548                              |
| N <sub>2</sub> @Ru <sub>4</sub> _BN | 1.947-1.948  | 2.093        | 1.221  | 1541                              |

Table S2 Bader charges for Al<sub>n</sub>@graphene and Al<sub>n</sub>@BN\_graphene (n=4-8)

| S.No. | q(Al <sub>n</sub> ) | q(graphene) | q(Al <sub>n</sub> ) | q(BN_graphene) |
|-------|---------------------|-------------|---------------------|----------------|
| n=4   | 0.27                | -0.27       | 0.52                | -0.52          |
| n=5   | 0.04                | -0.04       | 0.64                | -0.64          |
| n=6   | 0.06                | -0.06       | 0.66                | -0.66          |
| n=7   | 0.57                | -0.57       | 0.76                | -0.76          |
| n=8   | 0.03                | -0.03       | 0.42                | -0.42          |

## 2. Cartesian coordinates of optimized structures given in Figure 1, 2, 3 (in Å)

(i) Cartesian Coordinates for Optimized structures given in Figure 1(in Å)

$N_2@Al_4$

6

|    |          |           |           |
|----|----------|-----------|-----------|
| Al | 5.105913 | 10.965635 | 7.267518  |
| Al | 6.522225 | 11.605378 | 9.299214  |
| Al | 4.493008 | 10.199669 | 9.812287  |
| Al | 3.072368 | 9.585839  | 7.755453  |
| N  | 3.901717 | 9.571952  | 11.730426 |
| N  | 3.036352 | 9.107137  | 11.103495 |

$N_2@Al_5$

7

|    |          |           |          |
|----|----------|-----------|----------|
| Al | 5.677597 | 11.050996 | 6.814899 |
| Al | 3.475993 | 9.305943  | 7.895963 |
| Al | 4.944396 | 11.047635 | 9.413311 |
| Al | 7.261175 | 11.972760 | 8.631177 |
| Al | 7.390785 | 12.986024 | 6.208226 |
| N  | 3.989480 | 10.651749 | 6.165250 |
| N  | 2.912642 | 10.131430 | 6.036777 |

$N_2@Al_6$

8

|    |          |           |           |
|----|----------|-----------|-----------|
| Al | 6.066570 | 9.721775  | 7.401635  |
| Al | 6.560998 | 8.957557  | 10.239793 |
| Al | 8.154300 | 8.488975  | 8.269573  |
| Al | 8.109553 | 11.282422 | 7.509412  |
| Al | 8.586171 | 10.543437 | 10.270410 |
| Al | 6.530456 | 11.847710 | 9.461083  |
| N  | 3.270471 | 10.129140 | 8.906644  |
| N  | 3.432254 | 9.923135  | 9.993792  |

$N_2@Al_7$

9

|    |          |           |           |
|----|----------|-----------|-----------|
| Al | 6.114725 | 9.919903  | 7.324778  |
| Al | 6.152464 | 8.293381  | 9.723842  |
| Al | 5.046188 | 9.336045  | 12.017154 |
| Al | 7.400722 | 10.212898 | 11.205797 |

|    |          |           |          |
|----|----------|-----------|----------|
| Al | 8.453749 | 9.459878  | 8.971171 |
| Al | 7.250492 | 11.865511 | 8.810153 |
| Al | 5.054041 | 10.747004 | 9.688832 |
| N  | 5.582141 | 8.047130  | 6.735938 |
| N  | 5.708496 | 7.982383  | 7.948075 |

### N<sub>2</sub>@Al<sub>8</sub>

10

|    |          |           |           |
|----|----------|-----------|-----------|
| N  | 3.914707 | 8.419539  | 7.758504  |
| N  | 4.161070 | 8.897655  | 6.716479  |
| Al | 6.190067 | 9.667361  | 7.322135  |
| Al | 7.450591 | 8.354021  | 9.183712  |
| Al | 6.344023 | 10.791967 | 9.973943  |
| Al | 4.803048 | 8.700170  | 9.663148  |
| Al | 6.427484 | 7.455451  | 11.533750 |
| Al | 8.085210 | 9.484446  | 11.404249 |
| Al | 6.708897 | 11.349345 | 12.715311 |
| Al | 4.946287 | 9.549468  | 12.030749 |

### Al<sub>4</sub>@graphene

54

|   |          |          |          |
|---|----------|----------|----------|
| C | 7.824435 | 8.607874 | 4.897331 |
| C | 7.105290 | 7.366684 | 4.895521 |
| C | 7.820906 | 6.131702 | 4.856634 |
| C | 9.251861 | 6.133111 | 4.831927 |
| C | 9.966280 | 7.370540 | 4.827726 |
| C | 9.251030 | 8.608531 | 4.852552 |
| C | 7.107181 | 4.892568 | 4.841951 |
| C | 5.678325 | 4.892280 | 4.841470 |
| C | 4.961892 | 6.128601 | 4.868705 |
| C | 5.678042 | 7.360454 | 4.918662 |
| C | 3.530504 | 6.131018 | 4.859940 |
| C | 2.817349 | 4.894645 | 4.836079 |
| C | 3.533091 | 3.656459 | 4.827757 |
| C | 4.962150 | 3.655976 | 4.828920 |
| C | 2.814277 | 7.369879 | 4.847704 |
| C | 1.386107 | 7.370157 | 4.815620 |
| C | 0.673407 | 6.131699 | 4.814494 |
| C | 1.387241 | 4.893673 | 4.820957 |
| C | 0.673721 | 8.608768 | 4.809103 |
| C | 1.387124 | 9.846509 | 4.815680 |
| C | 2.813026 | 9.845005 | 4.854529 |
| C | 3.521732 | 8.606628 | 4.888316 |

|    |          |           |           |
|----|----------|-----------|-----------|
| C  | 0.674089 | 11.086634 | 4.810073  |
| C  | 1.386766 | 12.323657 | 4.816359  |
| C  | 2.815752 | 12.324769 | 4.841258  |
| C  | 3.527395 | 11.088119 | 4.875885  |
| C  | 2.817356 | 2.419438  | 4.825416  |
| C  | 1.387913 | 2.418152  | 4.817877  |
| C  | 0.673565 | 3.655916  | 4.822490  |
| C  | 4.954131 | 11.097137 | 4.927573  |
| C  | 5.675636 | 12.327752 | 4.876066  |
| C  | 7.106420 | 12.323246 | 4.860446  |
| C  | 7.821694 | 13.559537 | 4.825203  |
| C  | 7.107297 | 14.798716 | 4.822028  |
| C  | 5.677592 | 14.799969 | 4.826583  |
| C  | 4.960581 | 13.563666 | 4.844462  |
| C  | 9.252755 | 13.561132 | 4.812556  |
| C  | 9.966744 | 14.799114 | 4.803564  |
| C  | 9.252804 | 16.037690 | 4.809208  |
| C  | 7.822961 | 16.035644 | 4.818588  |
| C  | 7.825032 | 11.085958 | 4.878697  |
| C  | 9.253013 | 11.084616 | 4.842695  |
| C  | 9.966533 | 12.322673 | 4.816059  |
| C  | 9.967074 | 17.276050 | 4.811332  |
| C  | 9.966562 | 9.846758  | 4.838499  |
| C  | 7.118824 | 9.847993  | 4.938794  |
| C  | 5.678062 | 9.851790  | 5.009250  |
| C  | 3.531702 | 13.562931 | 4.837916  |
| C  | 0.673573 | 1.181084  | 4.815754  |
| C  | 4.954601 | 8.599398  | 4.983872  |
| Al | 5.437393 | 9.586346  | 7.396873  |
| Al | 4.060337 | 7.746288  | 8.589570  |
| Al | 5.125251 | 9.407803  | 10.160543 |
| Al | 6.487996 | 11.237446 | 9.036545  |

## Al<sub>5</sub>@graphene

55

|   |          |           |          |
|---|----------|-----------|----------|
| C | 9.876211 | 12.428890 | 4.991746 |
| C | 9.163669 | 13.661915 | 4.991221 |
| C | 7.740729 | 13.661897 | 4.991791 |
| C | 7.027778 | 12.428614 | 4.989012 |
| C | 7.740476 | 11.195243 | 4.989492 |
| C | 9.163518 | 11.195644 | 4.990265 |
| C | 5.604494 | 12.429503 | 4.987264 |
| C | 4.891717 | 13.662057 | 4.989288 |
| C | 5.604907 | 14.894906 | 4.991808 |
| C | 7.027893 | 14.894779 | 4.991155 |
| C | 9.876408 | 14.895320 | 4.992265 |
| C | 9.163696 | 16.128188 | 4.991343 |
| C | 7.740711 | 16.127986 | 4.992164 |
| C | 4.890830 | 11.196105 | 4.984038 |
| C | 5.604478 | 9.961610  | 4.987707 |
| C | 3.468833 | 13.661698 | 4.990964 |
| C | 2.756146 | 12.428448 | 4.987185 |
| C | 1.333496 | 12.429232 | 4.991256 |

|    |          |           |           |
|----|----------|-----------|-----------|
| C  | 0.620791 | 11.196025 | 4.991058  |
| C  | 1.333380 | 9.963066  | 4.991186  |
| C  | 2.756052 | 9.962513  | 4.986849  |
| C  | 3.467826 | 11.195637 | 4.983889  |
| C  | 0.620684 | 8.729768  | 4.991172  |
| C  | 1.333040 | 7.496625  | 4.991624  |
| C  | 2.755998 | 7.496104  | 4.990477  |
| C  | 3.468388 | 8.729101  | 4.990160  |
| C  | 3.469142 | 6.263360  | 4.991794  |
| C  | 2.756508 | 5.030298  | 4.991212  |
| C  | 1.333511 | 5.030815  | 4.991908  |
| C  | 0.620481 | 6.263462  | 4.990663  |
| C  | 3.469307 | 3.797339  | 4.992207  |
| C  | 2.756491 | 2.564196  | 4.991340  |
| C  | 1.333536 | 2.564757  | 4.992147  |
| C  | 0.620797 | 3.797588  | 4.991226  |
| C  | 4.892238 | 3.797218  | 4.991291  |
| C  | 5.605013 | 5.030234  | 4.991989  |
| C  | 4.892054 | 6.262919  | 4.990608  |
| C  | 5.604868 | 7.495732  | 4.991006  |
| C  | 7.027923 | 7.496036  | 4.990406  |
| C  | 7.740777 | 6.263364  | 4.992011  |
| C  | 7.027954 | 5.030254  | 4.991207  |
| C  | 7.741104 | 8.728932  | 4.990597  |
| C  | 9.163900 | 8.729677  | 4.991000  |
| C  | 9.876603 | 7.496976  | 4.992302  |
| C  | 9.163765 | 6.263714  | 4.991307  |
| C  | 4.891315 | 8.728125  | 4.988588  |
| C  | 7.028330 | 9.961764  | 4.987283  |
| C  | 9.876441 | 9.963053  | 4.991847  |
| C  | 0.620874 | 1.331515  | 4.991350  |
| C  | 9.876489 | 17.361530 | 4.992256  |
| Al | 5.399451 | 10.732038 | 8.351211  |
| Al | 3.302172 | 11.188214 | 9.635516  |
| Al | 3.426557 | 10.340443 | 12.088614 |
| Al | 5.698447 | 10.732854 | 11.094304 |
| Al | 7.119215 | 9.252308  | 9.645871  |

## Al<sub>6</sub>@graphene

56

|   |          |          |          |
|---|----------|----------|----------|
| C | 7.832950 | 8.626739 | 4.833382 |
| C | 7.119980 | 7.392547 | 4.849483 |
| C | 7.832681 | 6.160968 | 4.885093 |
| C | 9.256689 | 6.161204 | 4.895218 |
| C | 9.969065 | 7.394354 | 4.886886 |
| C | 9.258016 | 8.627790 | 4.859290 |
| C | 5.696788 | 7.393160 | 4.834559 |
| C | 4.985599 | 6.160658 | 4.873999 |
| C | 5.697483 | 4.928015 | 4.890771 |
| C | 7.121115 | 4.927994 | 4.892199 |
| C | 3.561726 | 6.160927 | 4.885011 |
| C | 2.849448 | 4.927970 | 4.896282 |
| C | 3.561457 | 3.695099 | 4.894082 |



|    |          |           |           |
|----|----------|-----------|-----------|
| C  | 4.985197 | 3.695349  | 4.890978  |
| C  | 2.849902 | 7.393693  | 4.873562  |
| C  | 1.426043 | 7.394184  | 4.888559  |
| C  | 0.713940 | 6.161473  | 4.887824  |
| C  | 1.425690 | 4.928210  | 4.892075  |
| C  | 0.714029 | 8.627032  | 4.890706  |
| C  | 1.425508 | 9.860108  | 4.877866  |
| C  | 2.848550 | 9.860617  | 4.835272  |
| C  | 3.560705 | 8.626926  | 4.831893  |
| C  | 3.560446 | 11.094348 | 4.800923  |
| C  | 2.849459 | 12.326890 | 4.844489  |
| C  | 1.426137 | 12.326165 | 4.880548  |
| C  | 0.713949 | 11.093319 | 4.890220  |
| C  | 2.849255 | 2.462348  | 4.887912  |
| C  | 1.425546 | 2.462169  | 4.891802  |
| C  | 0.713513 | 3.695472  | 4.886301  |
| C  | 3.560762 | 13.560496 | 4.856115  |
| C  | 4.984196 | 13.561385 | 4.829891  |
| C  | 5.696573 | 14.793661 | 4.867168  |
| C  | 7.120293 | 14.793976 | 4.867192  |
| C  | 7.832237 | 13.561537 | 4.836278  |
| C  | 7.119196 | 12.329981 | 4.780237  |
| C  | 5.695105 | 12.329750 | 4.768149  |
| C  | 9.256196 | 13.560731 | 4.867577  |
| C  | 9.968932 | 12.327778 | 4.864386  |
| C  | 9.258033 | 11.095157 | 4.833544  |
| C  | 7.833214 | 11.095636 | 4.786324  |
| C  | 7.832974 | 16.025900 | 4.891646  |
| C  | 9.256675 | 16.025794 | 4.897589  |
| C  | 9.968706 | 14.792854 | 4.891848  |
| C  | 7.121040 | 9.860663  | 4.782503  |
| C  | 4.984429 | 8.625425  | 4.795383  |
| C  | 5.695645 | 9.860889  | 4.761774  |
| C  | 4.983425 | 11.096369 | 4.754914  |
| C  | 9.968889 | 9.861690  | 4.857624  |
| C  | 9.968694 | 17.258926 | 4.903259  |
| C  | 0.714205 | 1.228754  | 4.890977  |
| Al | 7.654287 | 11.522788 | 8.144271  |
| Al | 7.976581 | 8.608303  | 8.305222  |
| Al | 6.202975 | 8.516258  | 10.168515 |
| Al | 8.600413 | 10.267588 | 10.178572 |
| Al | 5.894085 | 11.449791 | 10.011360 |
| Al | 5.295664 | 9.801157  | 8.128017  |

## Al<sub>7</sub>@graphene

57

|   |          |          |          |
|---|----------|----------|----------|
| C | 7.833261 | 8.623047 | 4.925725 |
| C | 7.116683 | 7.388729 | 4.922889 |
| C | 7.826537 | 6.160422 | 4.913527 |
| C | 9.251582 | 6.161645 | 4.911709 |
| C | 9.963360 | 7.392595 | 4.911008 |

|    |          |           |           |
|----|----------|-----------|-----------|
| C  | 9.253688 | 8.626401  | 4.913318  |
| C  | 5.689927 | 7.382502  | 4.936437  |
| C  | 4.976797 | 6.156070  | 4.921311  |
| C  | 5.691344 | 4.925690  | 4.912636  |
| C  | 7.113353 | 4.927000  | 4.912339  |
| C  | 3.552811 | 6.159128  | 4.918846  |
| C  | 2.842018 | 4.928151  | 4.913217  |
| C  | 3.554616 | 3.695497  | 4.912081  |
| C  | 4.977635 | 3.695052  | 4.911197  |
| C  | 2.838501 | 7.390933  | 4.921946  |
| C  | 1.415734 | 7.394328  | 4.912829  |
| C  | 0.706370 | 6.161011  | 4.911176  |
| C  | 1.418051 | 4.929041  | 4.912140  |
| C  | 0.705942 | 8.626729  | 4.912686  |
| C  | 1.418110 | 9.860918  | 4.914513  |
| C  | 2.837524 | 9.860550  | 4.927154  |
| C  | 3.543775 | 8.622169  | 4.939814  |
| C  | 3.548050 | 11.098435 | 4.929614  |
| C  | 2.840413 | 12.330067 | 4.914152  |
| C  | 1.416884 | 12.327344 | 4.911161  |
| C  | 0.706417 | 11.095484 | 4.911824  |
| C  | 2.842139 | 2.463296  | 4.911965  |
| C  | 1.418673 | 2.462505  | 4.911994  |
| C  | 0.707330 | 3.695720  | 4.912042  |
| C  | 3.553543 | 13.561809 | 4.913044  |
| C  | 4.976801 | 13.563496 | 4.913709  |
| C  | 5.690784 | 14.794655 | 4.910918  |
| C  | 7.112978 | 14.793902 | 4.911998  |
| C  | 7.825513 | 13.559799 | 4.913200  |
| C  | 7.115243 | 12.329863 | 4.920873  |
| C  | 5.688698 | 12.333989 | 4.927564  |
| C  | 9.250433 | 13.559686 | 4.911784  |
| C  | 9.962071 | 12.328145 | 4.910778  |
| C  | 9.253155 | 11.093911 | 4.913350  |
| C  | 7.831999 | 11.096955 | 4.926136  |
| C  | 7.825914 | 16.025848 | 4.911927  |
| C  | 9.249675 | 16.026161 | 4.912201  |
| C  | 9.961183 | 14.793132 | 4.911897  |
| C  | 7.129547 | 9.859900  | 4.950238  |
| C  | 5.687316 | 9.862254  | 5.000099  |
| C  | 9.963703 | 9.860528  | 4.912906  |
| C  | 9.961748 | 17.259168 | 4.911753  |
| C  | 4.968277 | 11.108909 | 4.953464  |
| C  | 0.707397 | 1.229949  | 4.911121  |
| C  | 4.967476 | 8.610063  | 4.968395  |
| Al | 5.712510 | 9.629645  | 7.181464  |
| Al | 4.096487 | 9.185866  | 9.186377  |
| Al | 4.923550 | 10.544041 | 11.231577 |
| Al | 6.388982 | 11.158565 | 9.186646  |
| Al | 7.473123 | 9.676953  | 11.008793 |
| Al | 5.409640 | 7.892153  | 11.009108 |
| Al | 6.959262 | 8.179376  | 8.962631  |

Al<sub>8</sub>@graphene

|    |          |           |           |
|----|----------|-----------|-----------|
| C  | 7.796332 | 8.653712  | 4.742520  |
| C  | 7.083665 | 7.420452  | 4.745070  |
| C  | 7.795034 | 6.187535  | 4.747184  |
| C  | 9.218536 | 6.187549  | 4.748195  |
| C  | 9.930622 | 7.420792  | 4.748470  |
| C  | 9.219167 | 8.653691  | 4.746343  |
| C  | 5.659788 | 7.419580  | 4.744867  |
| C  | 4.947023 | 6.186936  | 4.746956  |
| C  | 5.659096 | 4.954478  | 4.747719  |
| C  | 7.082801 | 4.954539  | 4.747924  |
| C  | 3.523371 | 6.187654  | 4.748404  |
| C  | 2.811294 | 4.954488  | 4.749100  |
| C  | 3.523330 | 3.721681  | 4.748880  |
| C  | 4.947068 | 3.721409  | 4.748296  |
| C  | 2.810993 | 7.420355  | 4.747445  |
| C  | 1.387477 | 7.420802  | 4.748575  |
| C  | 0.675539 | 6.187591  | 4.749060  |
| C  | 1.387620 | 4.954773  | 4.749196  |
| C  | 0.675627 | 8.653671  | 4.748342  |
| C  | 1.387523 | 9.886953  | 4.748495  |
| C  | 2.811056 | 9.886694  | 4.747654  |
| C  | 3.522117 | 8.653464  | 4.746009  |
| C  | 3.522996 | 11.120298 | 4.748058  |
| C  | 2.811211 | 12.353071 | 4.748364  |
| C  | 1.387592 | 12.353062 | 4.748806  |
| C  | 0.675628 | 11.119834 | 4.748505  |
| C  | 2.811307 | 2.488369  | 4.749002  |
| C  | 1.387620 | 2.488603  | 4.749178  |
| C  | 0.675600 | 3.721500  | 4.749221  |
| C  | 3.523373 | 13.586181 | 4.748636  |
| C  | 4.946993 | 13.586203 | 4.748114  |
| C  | 5.659063 | 14.819293 | 4.748492  |
| C  | 7.082737 | 14.819029 | 4.748446  |
| C  | 7.794848 | 13.586238 | 4.748567  |
| C  | 7.083054 | 12.353003 | 4.747401  |
| C  | 5.659158 | 12.353631 | 4.747294  |
| C  | 9.218514 | 13.585967 | 4.748391  |
| C  | 9.930630 | 12.353178 | 4.748640  |
| C  | 9.218950 | 11.119971 | 4.747381  |
| C  | 7.795791 | 11.120540 | 4.745004  |
| C  | 7.794685 | 16.052304 | 4.748777  |
| C  | 9.218410 | 16.052042 | 4.748964  |
| C  | 9.930543 | 14.819170 | 4.748755  |
| C  | 7.085031 | 9.886868  | 4.743436  |
| C  | 5.659520 | 9.887908  | 4.748714  |
| C  | 9.930715 | 9.887051  | 4.748257  |
| C  | 9.930580 | 17.285411 | 4.748824  |
| C  | 4.946433 | 11.121365 | 4.746752  |
| C  | 0.675551 | 1.255191  | 4.749113  |
| C  | 4.946053 | 8.652290  | 4.746780  |
| Al | 5.737757 | 9.246016  | 7.879353  |
| Al | 7.584365 | 8.480153  | 9.447030  |
| Al | 6.406437 | 11.016439 | 9.884274  |
| Al | 4.375171 | 8.985442  | 10.006195 |
| Al | 6.148734 | 7.799139  | 11.527486 |
| Al | 8.074625 | 9.869918  | 11.541963 |

|    |          |           |           |
|----|----------|-----------|-----------|
| Al | 6.952027 | 10.351106 | 13.807265 |
| Al | 5.083370 | 10.366236 | 12.033360 |

(ii) Cartesian Coordinates of Optimized structures given in Figure 2 (in Å)

Al<sub>4</sub>@BN\_graphene

54

|   |          |           |          |
|---|----------|-----------|----------|
| C | 7.826342 | 16.040476 | 4.742189 |
| C | 7.114118 | 14.813054 | 4.755341 |
| C | 7.827804 | 13.579761 | 4.770242 |
| C | 9.255010 | 13.561930 | 4.734768 |
| C | 9.962304 | 14.800721 | 4.723914 |
| C | 9.252499 | 16.037768 | 4.732175 |
| C | 9.978566 | 12.331274 | 4.741432 |
| C | 9.257102 | 11.109542 | 4.806094 |
| C | 7.844951 | 11.135210 | 4.913395 |
| C | 7.119949 | 12.357912 | 4.867594 |
| C | 5.682761 | 14.802466 | 4.772006 |
| C | 4.979948 | 13.571368 | 4.827733 |
| C | 3.478117 | 11.080781 | 4.951022 |
| C | 2.795639 | 12.312413 | 4.836325 |
| C | 3.545677 | 13.550458 | 4.814406 |
| C | 2.780160 | 9.837782  | 4.902305 |
| C | 1.369043 | 9.841515  | 4.789171 |
| C | 0.672335 | 11.088848 | 4.764688 |
| C | 1.375376 | 12.328689 | 4.778086 |
| C | 2.800446 | 7.383317  | 4.843949 |
| C | 1.383167 | 7.371349  | 4.763166 |
| C | 0.660128 | 8.606562  | 4.750816 |
| C | 0.682065 | 6.130694  | 4.738772 |
| C | 1.389490 | 4.892684  | 4.760202 |
| C | 2.820503 | 4.906513  | 4.780854 |
| C | 3.539109 | 6.147695  | 4.838429 |
| C | 3.537157 | 3.658764  | 4.771930 |
| C | 2.831315 | 2.416478  | 4.776249 |
| C | 1.394113 | 2.418456  | 4.771200 |
| C | 0.669336 | 3.650117  | 4.767650 |
| C | 4.962865 | 3.651526  | 4.760977 |
| C | 5.684694 | 4.881398  | 4.780526 |
| C | 4.987069 | 6.114865  | 4.861036 |
| C | 5.680638 | 9.853981  | 5.418602 |
| C | 5.711230 | 7.320588  | 5.007202 |
| C | 7.131455 | 7.340230  | 4.934805 |
| C | 9.250984 | 8.591441  | 4.848878 |
| C | 9.953460 | 9.843369  | 4.809058 |
| C | 7.111882 | 4.893396  | 4.772854 |
| C | 7.837427 | 6.120533  | 4.811116 |
| C | 9.263550 | 6.125134  | 4.776368 |
| C | 9.970475 | 7.367780  | 4.789119 |
| C | 0.673769 | 1.188627  | 4.768323 |
| C | 9.968079 | 17.273715 | 4.747078 |

|    |          |           |           |
|----|----------|-----------|-----------|
| N  | 5.710401 | 12.382381 | 4.924539  |
| N  | 3.456517 | 8.605361  | 4.974671  |
| N  | 7.861676 | 8.554112  | 4.973782  |
| B  | 4.975281 | 11.133942 | 5.132346  |
| B  | 7.142882 | 9.819718  | 5.138580  |
| B  | 4.905444 | 8.580623  | 5.248345  |
| Al | 5.478580 | 9.702635  | 7.461964  |
| Al | 6.489694 | 11.147195 | 9.312717  |
| Al | 4.989963 | 9.321417  | 10.178294 |
| Al | 4.049823 | 7.781600  | 8.426310  |

## Al<sub>5</sub>@BN\_graphene

55

|   |          |           |          |
|---|----------|-----------|----------|
| C | 0.699347 | 3.705549  | 4.903265 |
| C | 1.418848 | 4.942740  | 4.895644 |
| C | 2.839858 | 4.956671  | 4.896234 |
| C | 3.551587 | 3.715153  | 4.883586 |
| C | 2.849148 | 2.479352  | 4.882849 |
| C | 1.417389 | 2.481115  | 4.884056 |
| C | 3.556446 | 6.196068  | 4.942143 |
| C | 4.997279 | 6.167277  | 4.969131 |
| C | 5.690491 | 4.933340  | 4.907035 |
| C | 4.969838 | 3.705836  | 4.880440 |
| C | 5.718990 | 7.373177  | 5.115474 |
| C | 7.134207 | 7.382306  | 5.084297 |
| C | 7.835712 | 6.168703  | 4.953733 |
| C | 7.111376 | 4.942809  | 4.909424 |
| C | 9.246654 | 8.630974  | 4.986509 |
| C | 9.959461 | 7.411087  | 4.914824 |
| C | 9.257756 | 6.168920  | 4.912038 |
| C | 0.715327 | 6.175579  | 4.894888 |
| C | 1.416216 | 7.409209  | 4.910523 |
| C | 2.827839 | 7.421715  | 4.967329 |
| C | 2.799903 | 9.876449  | 5.023279 |
| C | 1.398378 | 9.872625  | 4.927601 |
| C | 0.688392 | 8.638904  | 4.906595 |
| C | 3.498353 | 11.106639 | 5.030270 |
| C | 2.815137 | 12.337067 | 4.912304 |
| C | 1.400042 | 12.350474 | 4.879024 |
| C | 0.700128 | 11.113033 | 4.891262 |
| C | 5.682064 | 9.887599  | 5.724950 |
| C | 9.946284 | 9.873923  | 4.957138 |
| C | 9.249122 | 11.135105 | 4.981670 |
| C | 7.844347 | 11.159189 | 5.111886 |
| C | 7.126677 | 12.380089 | 5.048368 |
| C | 7.827373 | 13.594261 | 4.938071 |
| C | 9.251187 | 13.575673 | 4.910955 |
| C | 9.971055 | 12.352001 | 4.915674 |
| C | 7.115472 | 14.825785 | 4.896393 |
| C | 5.687940 | 14.812499 | 4.892098 |
| C | 4.988833 | 13.585742 | 4.936504 |
| C | 9.956809 | 14.809047 | 4.890731 |
| C | 9.247282 | 16.042039 | 4.888318 |

|    |          |           |           |
|----|----------|-----------|-----------|
| C  | 7.825442 | 16.045470 | 4.885538  |
| C  | 3.561179 | 13.568895 | 4.909978  |
| C  | 9.958576 | 17.273521 | 4.886490  |
| C  | 0.698672 | 1.257533  | 4.879032  |
| N  | 7.854893 | 8.599472  | 5.139083  |
| N  | 3.495926 | 8.643940  | 5.097055  |
| N  | 5.713298 | 12.396346 | 5.061844  |
| B  | 7.145278 | 9.848309  | 5.363892  |
| B  | 4.930368 | 8.636691  | 5.337590  |
| B  | 4.983076 | 11.159452 | 5.276289  |
| Al | 5.245374 | 10.315551 | 7.647631  |
| Al | 3.891033 | 11.736568 | 9.136447  |
| Al | 4.215185 | 11.038778 | 11.848505 |
| Al | 5.605667 | 9.795564  | 10.191174 |
| Al | 2.484575 | 12.707656 | 10.985095 |

### Al<sub>6</sub>@BN\_graphene

56

|   |          |           |          |
|---|----------|-----------|----------|
| C | 7.860557 | 11.134175 | 5.230365 |
| C | 7.123011 | 12.354205 | 5.065165 |
| C | 7.828042 | 13.564150 | 4.885964 |
| C | 9.254704 | 13.545924 | 4.846867 |
| C | 9.976816 | 12.318033 | 4.845374 |
| C | 9.266813 | 11.100387 | 4.970768 |
| C | 9.957600 | 14.775492 | 4.775051 |
| C | 9.252613 | 16.009151 | 4.753704 |
| C | 7.831423 | 16.012924 | 4.745439 |
| C | 7.121544 | 14.787967 | 4.787409 |
| C | 4.995143 | 13.551303 | 4.873693 |
| C | 5.690425 | 14.779123 | 4.791336 |
| C | 9.965159 | 17.239280 | 4.752035 |
| C | 3.567186 | 13.534830 | 4.821177 |
| C | 2.821459 | 12.301073 | 4.830826 |
| C | 1.406297 | 12.316608 | 4.759885 |
| C | 0.708236 | 11.079267 | 4.761586 |
| C | 1.404619 | 9.839322  | 4.799521 |
| C | 2.808136 | 9.839393  | 4.918568 |
| C | 3.505757 | 11.074025 | 4.962814 |
| C | 2.833486 | 7.389496  | 4.819707 |
| C | 1.416752 | 7.381712  | 4.767818 |
| C | 0.696036 | 8.605600  | 4.774380 |
| C | 0.716330 | 6.143667  | 4.766045 |
| C | 1.418666 | 4.912118  | 4.758971 |
| C | 2.842126 | 4.924977  | 4.743172 |
| C | 3.560388 | 6.164016  | 4.785095 |
| C | 3.554879 | 3.685268  | 4.741490 |
| C | 4.976749 | 3.673084  | 4.744821 |
| C | 5.695601 | 4.899473  | 4.754106 |
| C | 5.003332 | 6.134923  | 4.817346 |
| C | 2.855045 | 2.446290  | 4.758007 |
| C | 1.420456 | 2.447963  | 4.757641 |
| C | 0.699549 | 3.672835  | 4.790658 |
| C | 7.116293 | 4.910267  | 4.757896 |

|    |          |           |           |
|----|----------|-----------|-----------|
| C  | 7.841776 | 6.134296  | 4.820801  |
| C  | 7.142077 | 7.348045  | 4.969659  |
| C  | 5.722481 | 7.337874  | 4.980155  |
| C  | 9.262782 | 6.131137  | 4.791853  |
| C  | 9.961770 | 7.376859  | 4.804449  |
| C  | 9.249680 | 8.589733  | 4.925683  |
| C  | 0.704158 | 1.223435  | 4.753848  |
| C  | 9.949178 | 9.840720  | 4.902816  |
| C  | 5.666450 | 9.845167  | 5.620953  |
| N  | 5.717681 | 12.367295 | 5.022330  |
| N  | 3.496140 | 8.610584  | 4.963744  |
| N  | 7.865796 | 8.549952  | 5.127740  |
| B  | 4.987826 | 11.120867 | 5.226913  |
| B  | 7.159986 | 9.796439  | 5.440926  |
| B  | 4.935639 | 8.599869  | 5.218423  |
| Al | 5.549948 | 9.788866  | 7.715046  |
| Al | 6.052057 | 11.714972 | 9.466855  |
| Al | 8.567035 | 10.520968 | 10.000890 |
| Al | 7.865708 | 8.494506  | 8.534779  |
| Al | 7.981355 | 11.359953 | 7.685678  |
| Al | 5.843601 | 9.079130  | 10.159268 |

### Al<sub>7</sub>@BN\_graphene

57

|   |          |           |          |
|---|----------|-----------|----------|
| C | 7.844865 | 11.145365 | 4.918152 |
| C | 7.122614 | 12.361667 | 4.918899 |
| C | 7.822519 | 13.578589 | 4.884024 |
| C | 9.244275 | 13.559260 | 4.875546 |
| C | 9.968701 | 12.334068 | 4.868270 |
| C | 9.253697 | 11.117723 | 4.869595 |
| C | 9.950781 | 14.790471 | 4.876116 |
| C | 9.241185 | 16.022809 | 4.877958 |
| C | 7.819399 | 16.024659 | 4.872107 |
| C | 7.107532 | 14.807775 | 4.872452 |
| C | 4.979921 | 13.572916 | 4.878716 |
| C | 5.679284 | 14.794865 | 4.864418 |
| C | 9.954050 | 17.253289 | 4.873497 |
| C | 3.554640 | 13.551421 | 4.873556 |
| C | 2.805453 | 12.320426 | 4.874561 |
| C | 1.393858 | 12.332249 | 4.863739 |
| C | 0.695819 | 11.092954 | 4.872989 |
| C | 1.391310 | 9.852367  | 4.882554 |
| C | 2.795727 | 9.854185  | 4.916649 |
| C | 3.487934 | 11.088038 | 4.927483 |
| C | 2.814631 | 7.393140  | 4.877259 |
| C | 1.406701 | 7.388244  | 4.869350 |
| C | 0.681949 | 8.618619  | 4.876169 |
| C | 0.710683 | 6.156475  | 4.867748 |
| C | 1.410612 | 4.922926  | 4.870137 |
| C | 2.830488 | 4.932379  | 4.870193 |
| C | 3.546514 | 6.169837  | 4.871585 |
| C | 3.542843 | 3.693038  | 4.866501 |
| C | 4.961094 | 3.682560  | 4.859209 |

|    |          |           |           |
|----|----------|-----------|-----------|
| C  | 5.681939 | 4.906335  | 4.857755  |
| C  | 4.985695 | 6.134017  | 4.866625  |
| C  | 2.841058 | 2.459093  | 4.868812  |
| C  | 1.411651 | 2.460835  | 4.866440  |
| C  | 0.693493 | 3.686082  | 4.866150  |
| C  | 7.104262 | 4.921311  | 4.867170  |
| C  | 7.830818 | 6.143544  | 4.874371  |
| C  | 7.126935 | 7.358882  | 4.900344  |
| C  | 5.712354 | 7.341782  | 4.910689  |
| C  | 9.254120 | 6.145852  | 4.868873  |
| C  | 9.957911 | 7.389499  | 4.860426  |
| C  | 9.249751 | 8.606072  | 4.863227  |
| C  | 0.693676 | 1.237195  | 4.861363  |
| C  | 9.942696 | 9.852069  | 4.863981  |
| C  | 5.681986 | 9.858217  | 5.333323  |
| N  | 5.707535 | 12.381570 | 4.931864  |
| N  | 3.484227 | 8.618735  | 4.928207  |
| N  | 7.853013 | 8.574709  | 4.909701  |
| B  | 4.977408 | 11.144004 | 5.066513  |
| B  | 7.147118 | 9.827169  | 5.044554  |
| B  | 4.921406 | 8.604644  | 5.052127  |
| Al | 6.960439 | 8.208503  | 9.074620  |
| Al | 5.449351 | 7.903006  | 11.160908 |
| Al | 7.526418 | 9.616048  | 11.169008 |
| Al | 6.488931 | 11.158901 | 9.374125  |
| Al | 4.995130 | 10.553689 | 11.396013 |
| Al | 4.188310 | 9.221854  | 9.328346  |
| Al | 5.767867 | 9.733256  | 7.320266  |

## Al<sub>8</sub>@BN\_graphene

58

|   |          |           |          |
|---|----------|-----------|----------|
| C | 7.826043 | 11.171512 | 4.902169 |
| C | 7.103157 | 12.390436 | 4.892221 |
| C | 7.803616 | 13.607985 | 4.796468 |
| C | 9.225896 | 13.590322 | 4.749202 |
| C | 9.948669 | 12.366882 | 4.732907 |
| C | 9.230972 | 11.148342 | 4.778057 |
| C | 9.931689 | 14.823021 | 4.732997 |
| C | 9.221650 | 16.054575 | 4.729056 |
| C | 7.800023 | 16.057639 | 4.732061 |
| C | 7.090287 | 14.836416 | 4.765582 |
| C | 4.965389 | 13.597557 | 4.823115 |
| C | 5.662948 | 14.823718 | 4.761695 |
| C | 9.935097 | 17.284491 | 4.721229 |
| C | 3.536505 | 13.579254 | 4.793172 |
| C | 2.789878 | 12.347605 | 4.816278 |
| C | 1.376999 | 12.360535 | 4.746620 |
| C | 0.676673 | 11.124164 | 4.748146 |
| C | 1.374958 | 9.885567  | 4.788067 |
| C | 2.779889 | 9.885366  | 4.892023 |
| C | 3.474319 | 11.119876 | 4.937031 |
| C | 2.801447 | 7.433223  | 4.795480 |
| C | 1.390713 | 7.423583  | 4.743639 |



|    |          |           |           |
|----|----------|-----------|-----------|
| C  | 0.666709 | 8.653690  | 4.750474  |
| C  | 0.690454 | 6.190371  | 4.713560  |
| C  | 1.391564 | 4.956275  | 4.714025  |
| C  | 2.812167 | 4.967372  | 4.726194  |
| C  | 3.529880 | 6.204620  | 4.765940  |
| C  | 3.526064 | 3.725579  | 4.727935  |
| C  | 4.944694 | 3.716771  | 4.728761  |
| C  | 5.664666 | 4.943294  | 4.730402  |
| C  | 4.969021 | 6.174301  | 4.775682  |
| C  | 2.824804 | 2.488269  | 4.739297  |
| C  | 1.393298 | 2.490145  | 4.718270  |
| C  | 0.674429 | 3.716743  | 4.715615  |
| C  | 7.084932 | 4.954178  | 4.731822  |
| C  | 7.810657 | 6.177832  | 4.750968  |
| C  | 7.109851 | 7.395363  | 4.842797  |
| C  | 5.693102 | 7.379384  | 4.883348  |
| C  | 9.231164 | 6.179548  | 4.724381  |
| C  | 9.936039 | 7.421158  | 4.718860  |
| C  | 9.222784 | 8.639908  | 4.759689  |
| C  | 0.676117 | 1.265477  | 4.714182  |
| C  | 9.923694 | 9.885677  | 4.748959  |
| C  | 5.669310 | 9.885719  | 5.426227  |
| N  | 5.692547 | 12.411987 | 4.947174  |
| N  | 3.465586 | 8.654045  | 4.915576  |
| N  | 7.834053 | 8.603703  | 4.867983  |
| B  | 4.963213 | 11.168586 | 5.139951  |
| B  | 7.126747 | 9.855166  | 5.089899  |
| B  | 4.907766 | 8.641473  | 5.096896  |
| Al | 5.079458 | 10.006419 | 11.715735 |
| Al | 6.047869 | 7.565992  | 10.997886 |
| Al | 7.906903 | 9.556415  | 11.261727 |
| Al | 6.968180 | 10.836181 | 13.401252 |
| Al | 4.436874 | 8.951229  | 9.465744  |
| Al | 6.398491 | 10.967933 | 9.691778  |
| Al | 7.475045 | 8.448576  | 8.991591  |
| Al | 5.825225 | 9.639409  | 7.449727  |

(iii) Cartesian Coordinates for Optimized structure given in Figure 3 (in Å)

N<sub>2</sub>@Al<sub>4</sub>@BN\_graphene

56

|   |          |           |          |
|---|----------|-----------|----------|
| C | 7.859273 | 16.101586 | 4.703601 |
| C | 7.145410 | 14.874911 | 4.719728 |
| C | 7.860240 | 13.642531 | 4.745519 |
| C | 9.288403 | 13.623831 | 4.708656 |
| C | 9.997356 | 14.861238 | 4.700141 |
| C | 9.286063 | 16.098322 | 4.700634 |
| C | 7.152126 | 12.421650 | 4.861670 |
| C | 5.012533 | 13.631842 | 4.794768 |
| C | 5.714422 | 14.864504 | 4.725754 |

|    |           |           |           |
|----|-----------|-----------|-----------|
| C  | 10.011800 | 12.393591 | 4.710992  |
| C  | 9.286981  | 11.173854 | 4.774506  |
| C  | 7.877454  | 11.199461 | 4.898965  |
| C  | 5.716222  | 9.916371  | 5.455819  |
| C  | 3.577025  | 13.610268 | 4.766208  |
| C  | 2.825776  | 12.374557 | 4.800351  |
| C  | 3.509847  | 11.143810 | 4.948227  |
| C  | 2.812626  | 9.901863  | 4.912675  |
| C  | 1.401769  | 9.902149  | 4.780931  |
| C  | 0.704234  | 11.147423 | 4.734238  |
| C  | 1.406179  | 12.389129 | 4.733441  |
| C  | 2.837064  | 7.444773  | 4.843700  |
| C  | 1.418411  | 7.434317  | 4.748923  |
| C  | 0.693821  | 8.666995  | 4.736633  |
| C  | 3.572199  | 6.209676  | 4.818775  |
| C  | 2.852011  | 4.966797  | 4.736295  |
| C  | 1.421950  | 4.954416  | 4.711274  |
| C  | 0.716094  | 6.193806  | 4.708454  |
| C  | 5.017607  | 6.177961  | 4.844609  |
| C  | 5.715089  | 4.942266  | 4.746302  |
| C  | 4.993927  | 3.712645  | 4.711803  |
| C  | 3.567769  | 3.720145  | 4.713428  |
| C  | 5.742510  | 7.386131  | 4.985245  |
| C  | 7.163900  | 7.401982  | 4.914370  |
| C  | 7.869495  | 6.180853  | 4.784168  |
| C  | 7.141486  | 4.953219  | 4.737931  |
| C  | 9.281966  | 8.652616  | 4.810693  |
| C  | 10.000189 | 7.428908  | 4.742339  |
| C  | 9.294792  | 6.183934  | 4.737623  |
| C  | 0.699756  | 3.711797  | 4.713650  |
| C  | 1.424274  | 2.479352  | 4.707187  |
| C  | 2.862035  | 2.476253  | 4.712599  |
| C  | 9.981791  | 9.905435  | 4.765290  |
| C  | 0.703515  | 1.248672  | 4.711990  |
| C  | 10.000592 | 17.333598 | 4.707978  |
| N  | 5.740884  | 12.445437 | 4.924956  |
| N  | 3.499624  | 8.668371  | 4.983938  |
| N  | 7.889860  | 8.616874  | 4.943379  |
| N  | 3.903494  | 10.213252 | 10.409288 |
| N  | 2.684572  | 10.062978 | 10.379000 |
| B  | 5.004222  | 11.195419 | 5.151147  |
| B  | 7.176556  | 9.882104  | 5.125776  |
| B  | 4.952853  | 8.658598  | 5.194347  |
| Al | 5.906752  | 10.047116 | 7.568451  |
| Al | 3.364099  | 9.987420  | 8.451303  |
| Al | 5.736943  | 10.467629 | 10.179768 |
| Al | 7.941559  | 11.037865 | 8.930180  |

### N<sub>2</sub>@Al<sub>5</sub>@BN\_graphene

57

|   |          |           |          |
|---|----------|-----------|----------|
| N | 5.623276 | 12.499335 | 5.126403 |
| N | 7.764362 | 8.689745  | 5.239496 |
| N | 3.394703 | 8.739648  | 5.186518 |

|    |          |           |           |
|----|----------|-----------|-----------|
| N  | 5.556983 | 9.114163  | 11.961279 |
| N  | 6.174269 | 9.215824  | 10.876474 |
| C  | 7.033294 | 12.476519 | 5.126826  |
| C  | 7.735778 | 13.692210 | 5.008306  |
| C  | 7.023226 | 14.921607 | 4.962387  |
| C  | 5.597819 | 14.912568 | 4.954839  |
| C  | 4.896991 | 13.686364 | 4.997212  |
| C  | 9.157515 | 13.674364 | 4.982364  |
| C  | 9.879399 | 12.449431 | 4.999541  |
| C  | 9.161740 | 11.232554 | 5.082250  |
| C  | 7.755342 | 11.258029 | 5.208961  |
| C  | 7.733370 | 16.143978 | 4.949828  |
| C  | 9.154975 | 16.140730 | 4.946068  |
| C  | 9.864111 | 14.908237 | 4.953369  |
| C  | 9.851623 | 9.970703  | 5.061594  |
| C  | 9.154084 | 8.725158  | 5.091504  |
| C  | 9.867443 | 7.505959  | 5.000391  |
| C  | 9.162915 | 6.266860  | 4.991010  |
| C  | 7.742657 | 6.265991  | 5.039373  |
| C  | 7.039185 | 7.482031  | 5.179328  |
| C  | 7.018742 | 5.042811  | 4.983521  |
| C  | 5.597655 | 5.030706  | 4.985057  |
| C  | 4.901286 | 6.260814  | 5.065890  |
| C  | 5.622492 | 7.466372  | 5.217748  |
| C  | 4.879999 | 3.805798  | 4.944401  |
| C  | 3.458209 | 3.813039  | 4.947192  |
| C  | 2.745570 | 5.051756  | 4.975864  |
| C  | 3.463578 | 6.290283  | 5.036168  |
| C  | 2.755863 | 2.575361  | 4.936901  |
| C  | 1.326004 | 2.576772  | 4.950412  |
| C  | 0.605108 | 3.802442  | 4.986272  |
| C  | 1.322758 | 5.039594  | 4.977935  |
| C  | 2.732796 | 7.515397  | 5.061153  |
| C  | 1.320964 | 7.509079  | 4.993973  |
| C  | 0.620142 | 6.275050  | 4.977575  |
| C  | 2.710629 | 9.970251  | 5.094752  |
| C  | 1.305878 | 9.970933  | 4.990160  |
| C  | 0.599424 | 8.738423  | 4.977265  |
| C  | 0.609599 | 11.210464 | 4.945861  |
| C  | 1.309659 | 12.447018 | 4.933474  |
| C  | 2.725005 | 12.434284 | 4.970340  |
| C  | 3.407400 | 11.202890 | 5.092478  |
| C  | 0.607074 | 1.350697  | 4.945013  |
| C  | 5.586131 | 9.989310  | 5.703720  |
| C  | 3.470252 | 13.663908 | 4.962180  |
| C  | 9.866459 | 17.371228 | 4.947176  |
| B  | 4.831668 | 8.728214  | 5.405721  |
| B  | 4.890625 | 11.259796 | 5.302799  |
| B  | 7.057428 | 9.945753  | 5.429373  |
| Al | 5.297566 | 10.265410 | 7.677571  |
| Al | 7.068550 | 8.897266  | 9.290534  |
| Al | 3.813406 | 9.852881  | 11.390749 |
| Al | 3.326613 | 11.507210 | 9.163228  |
| Al | 5.850173 | 11.184551 | 10.006141 |

N<sub>2</sub>@Al<sub>6</sub>@BN\_graphene

|    |          |           |           |
|----|----------|-----------|-----------|
| N  | 7.877987 | 8.530056  | 4.983426  |
| N  | 3.515127 | 8.580668  | 5.046089  |
| N  | 5.737795 | 12.333507 | 4.964316  |
| N  | 4.345221 | 10.421982 | 10.000313 |
| N  | 4.462267 | 10.380414 | 8.594620  |
| C  | 7.152207 | 7.321478  | 4.913171  |
| C  | 7.852093 | 6.107767  | 4.780542  |
| C  | 9.276894 | 6.105173  | 4.764674  |
| C  | 9.979229 | 7.345840  | 4.766920  |
| C  | 9.268314 | 8.564077  | 4.826505  |
| C  | 5.737175 | 7.309038  | 4.994365  |
| C  | 5.016245 | 6.101691  | 4.850788  |
| C  | 5.708671 | 4.869394  | 4.753491  |
| C  | 7.128842 | 4.882871  | 4.735448  |
| C  | 3.576285 | 6.130120  | 4.842767  |
| C  | 2.857305 | 4.891684  | 4.775441  |
| C  | 3.569987 | 3.649897  | 4.756360  |
| C  | 4.989288 | 3.641003  | 4.739506  |
| C  | 2.851576 | 7.359932  | 4.890886  |
| C  | 1.438245 | 7.350842  | 4.811460  |
| C  | 0.736999 | 6.115750  | 4.770781  |
| C  | 1.436349 | 4.880442  | 4.765245  |
| C  | 0.713459 | 8.578806  | 4.802430  |
| C  | 1.422813 | 9.810174  | 4.846823  |
| C  | 2.826746 | 9.811407  | 4.981321  |
| C  | 3.523168 | 11.043236 | 5.000360  |
| C  | 2.840217 | 12.270425 | 4.854562  |
| C  | 1.423747 | 12.284314 | 4.784010  |
| C  | 0.723616 | 11.048534 | 4.788529  |
| C  | 2.869569 | 2.412167  | 4.766599  |
| C  | 1.436666 | 2.414614  | 4.755848  |
| C  | 0.717784 | 3.641365  | 4.761854  |
| C  | 3.583040 | 13.503833 | 4.821120  |
| C  | 5.012679 | 13.519664 | 4.839294  |
| C  | 5.706187 | 14.746852 | 4.759082  |
| C  | 7.137238 | 14.759070 | 4.736333  |
| C  | 7.848432 | 13.534687 | 4.806742  |
| C  | 7.147185 | 12.316794 | 4.953954  |
| C  | 9.273582 | 13.515245 | 4.780417  |
| C  | 9.994615 | 12.290563 | 4.780276  |
| C  | 9.276086 | 11.069958 | 4.834528  |
| C  | 7.875283 | 11.094244 | 4.990549  |
| C  | 7.844043 | 15.984286 | 4.713987  |
| C  | 9.266265 | 15.981170 | 4.737128  |
| C  | 9.977270 | 14.748566 | 4.758098  |
| C  | 5.717761 | 9.826695  | 5.610029  |
| C  | 9.967249 | 9.807818  | 4.804937  |
| C  | 9.980102 | 17.211099 | 4.750971  |
| C  | 0.720690 | 1.190201  | 4.751817  |
| B  | 7.174761 | 9.780551  | 5.226377  |
| B  | 5.012696 | 11.095012 | 5.220044  |
| B  | 4.957729 | 8.573263  | 5.272300  |
| Al | 6.020744 | 9.994818  | 7.617066  |
| Al | 5.585987 | 9.001894  | 10.139847 |
| Al | 7.756532 | 8.175437  | 8.843891  |

|    |          |           |           |
|----|----------|-----------|-----------|
| Al | 7.866426 | 12.235163 | 8.214277  |
| Al | 8.148552 | 10.421653 | 10.044148 |
| Al | 5.662414 | 11.747557 | 9.660620  |

N<sub>2</sub>@Al<sub>7</sub>@BN\_graphene

59

|   |          |           |          |
|---|----------|-----------|----------|
| C | 9.951497 | 17.251106 | 4.871251 |
| C | 9.239093 | 16.021661 | 4.877254 |
| C | 7.816009 | 16.023605 | 4.866943 |
| C | 7.106075 | 14.806202 | 4.868091 |
| C | 5.676915 | 14.792706 | 4.855222 |
| C | 4.979078 | 13.569762 | 4.868667 |
| C | 3.551753 | 13.547850 | 4.860785 |
| C | 2.802122 | 12.316764 | 4.858170 |
| C | 1.389580 | 12.329393 | 4.848094 |
| C | 0.692886 | 11.090189 | 4.866215 |
| C | 1.389728 | 9.850236  | 4.879706 |
| C | 2.795915 | 9.850178  | 4.906203 |
| C | 3.486619 | 11.085547 | 4.909031 |
| C | 7.121136 | 12.360813 | 4.911520 |
| C | 7.821251 | 13.577978 | 4.881473 |
| C | 9.243344 | 13.559422 | 4.875808 |
| C | 9.948191 | 14.790450 | 4.877215 |
| C | 9.966662 | 12.334993 | 4.868070 |
| C | 9.251102 | 11.117912 | 4.873677 |
| C | 7.842621 | 11.144857 | 4.921626 |
| C | 5.676673 | 9.858794  | 5.322840 |
| C | 2.814382 | 7.393090  | 4.861474 |
| C | 1.404869 | 7.387744  | 4.862642 |
| C | 0.681707 | 8.617892  | 4.876464 |
| C | 0.707477 | 6.155757  | 4.859721 |
| C | 1.406409 | 4.921975  | 4.858212 |
| C | 2.826746 | 4.930580  | 4.852242 |
| C | 3.543433 | 6.167087  | 4.852367 |
| C | 4.982971 | 6.132246  | 4.846016 |
| C | 5.710157 | 7.339113  | 4.893333 |
| C | 7.125222 | 7.357420  | 4.891730 |
| C | 9.242954 | 8.605666  | 4.863147 |
| C | 9.938785 | 9.852401  | 4.864073 |
| C | 9.952151 | 7.387987  | 4.852647 |
| C | 9.250829 | 6.144507  | 4.865939 |
| C | 7.828388 | 6.141523  | 4.864462 |
| C | 7.100958 | 4.919423  | 4.855254 |
| C | 5.679038 | 4.903393  | 4.840470 |
| C | 4.958521 | 3.679718  | 4.843425 |
| C | 3.539069 | 3.690597  | 4.849571 |
| C | 2.837702 | 2.455122  | 4.853603 |
| C | 0.689106 | 1.235049  | 4.845204 |
| C | 1.406887 | 2.458725  | 4.852303 |
| C | 0.689279 | 3.683993  | 4.858015 |
| N | 5.707361 | 12.381175 | 4.918531 |
| N | 3.481790 | 8.616973  | 4.909690 |
| N | 7.849032 | 8.572155  | 4.924721 |

|    |          |           |           |
|----|----------|-----------|-----------|
| N  | 7.201940 | 7.556271  | 11.553287 |
| N  | 7.900416 | 7.593543  | 10.370679 |
| B  | 4.976564 | 11.140483 | 5.045190  |
| B  | 4.922880 | 8.604185  | 5.040091  |
| B  | 7.142665 | 9.828221  | 5.059006  |
| Al | 5.697398 | 9.765303  | 7.335807  |
| Al | 6.579571 | 11.114703 | 9.413753  |
| Al | 4.210675 | 9.018705  | 9.335357  |
| Al | 6.679472 | 8.005246  | 8.957160  |
| Al | 5.098730 | 10.570814 | 11.425603 |
| Al | 5.291337 | 7.929256  | 11.437378 |
| Al | 7.655563 | 9.400509  | 11.151032 |

### N<sub>2</sub>@Al<sub>8</sub>@BN\_graphene

60

|   |          |           |           |
|---|----------|-----------|-----------|
| N | 7.843386 | 8.586780  | 4.823484  |
| N | 3.476456 | 8.638196  | 4.883291  |
| N | 5.703887 | 12.393659 | 4.887002  |
| N | 4.053892 | 10.593463 | 10.808060 |
| N | 5.216526 | 11.346336 | 10.910440 |
| C | 7.123041 | 7.377543  | 4.806649  |
| C | 7.825687 | 6.160565  | 4.729802  |
| C | 9.246110 | 6.164129  | 4.710667  |
| C | 9.948913 | 7.406444  | 4.702195  |
| C | 9.231898 | 8.623336  | 4.729646  |
| C | 5.706119 | 7.362394  | 4.847111  |
| C | 4.982285 | 6.157081  | 4.746299  |
| C | 5.678187 | 4.924631  | 4.703343  |
| C | 7.098614 | 4.937244  | 4.707015  |
| C | 3.542196 | 6.188842  | 4.735403  |
| C | 2.824048 | 4.951316  | 4.703743  |
| C | 3.539720 | 3.709855  | 4.702354  |
| C | 4.958468 | 3.700623  | 4.698299  |
| C | 2.812482 | 7.417617  | 4.762135  |
| C | 1.400367 | 7.408229  | 4.715102  |
| C | 0.700207 | 6.173306  | 4.693680  |
| C | 1.402787 | 4.940778  | 4.697280  |
| C | 0.676546 | 8.639535  | 4.719593  |
| C | 1.385992 | 9.870353  | 4.751354  |
| C | 2.790161 | 9.869209  | 4.849505  |
| C | 3.485900 | 11.103250 | 4.890315  |
| C | 2.804812 | 12.332050 | 4.770630  |
| C | 1.389563 | 12.347497 | 4.715107  |
| C | 0.689487 | 11.111115 | 4.718062  |
| C | 2.839288 | 2.472493  | 4.712549  |
| C | 1.406715 | 2.476115  | 4.700669  |
| C | 0.685278 | 3.701263  | 4.697771  |
| C | 3.551725 | 13.562963 | 4.750594  |
| C | 4.980487 | 13.579641 | 4.771011  |
| C | 5.677878 | 14.807655 | 4.717530  |
| C | 7.103809 | 14.819534 | 4.716086  |
| C | 7.814459 | 13.589888 | 4.735831  |
| C | 7.110303 | 12.372924 | 4.827660  |

|    |          |           |           |
|----|----------|-----------|-----------|
| C  | 9.237410 | 13.573439 | 4.704765  |
| C  | 9.958570 | 12.349301 | 4.698031  |
| C  | 9.238441 | 11.131044 | 4.727772  |
| C  | 7.832578 | 11.153568 | 4.834660  |
| C  | 7.813627 | 16.042184 | 4.700436  |
| C  | 9.234159 | 16.039802 | 4.701932  |
| C  | 9.941910 | 14.807198 | 4.700283  |
| C  | 5.680113 | 9.869218  | 5.393560  |
| C  | 9.932844 | 9.869336  | 4.713328  |
| C  | 9.948913 | 17.269361 | 4.702706  |
| C  | 0.688920 | 1.252098  | 4.695330  |
| B  | 7.131279 | 9.839508  | 5.031972  |
| B  | 4.974081 | 11.148511 | 5.095243  |
| B  | 4.920257 | 8.626268  | 5.064437  |
| Al | 5.912624 | 9.631895  | 7.444167  |
| Al | 7.430129 | 8.393103  | 9.042644  |
| Al | 6.608138 | 10.953521 | 9.597089  |
| Al | 4.361163 | 9.189825  | 9.526049  |
| Al | 6.000375 | 7.574527  | 11.070873 |
| Al | 7.845894 | 9.460757  | 11.391744 |
| Al | 6.383490 | 11.697330 | 12.366970 |
| Al | 4.646736 | 9.662408  | 12.361561 |
